# Supplementary material
Source: PubMed Central journal article supplement (PMC6377859)
Supplement: NIHMS1505877-supplement-1.pdf [file NIHMS1505877-supplement-1.pdf]

Supplemental Tables:

Supplemental Table 1: Pearson correlation coefficients for individual maternal persistent organic pollutant levels among controls (N=778). Shading scale represents low to high (yellow to green) correlation

|                   | <b>p,p'-DDE</b> | <b>Total PCBs</b> | <b>PCB 74</b> | <b>PCB 99</b> | <b>PCB 118</b> | <b>PCB 153</b> | <b>PCB 138</b> | <b>PCB 156</b> | <b>PCB 187</b> | <b>PCB 183</b> | <b>PCB 180</b> | <b>PCB 170</b> |
|-------------------|-----------------|-------------------|---------------|---------------|----------------|----------------|----------------|----------------|----------------|----------------|----------------|----------------|
| <b>p,p'-DDE</b>   | 1.00            | 0.40              | 0.48          | 0.64          | 0.53           | 0.39           | 0.45           | 0.40           | 0.30           | 0.36           | 0.25           | 0.25           |
| <b>Total PCBs</b> | 0.40            | 1.00              | 0.74          | 0.75          | 0.82           | 0.99           | 0.98           | 0.97           | 0.96           | 0.97           | 0.95           | 0.95           |
| <b>PCB 74</b>     | 0.48            | 0.74              | 1.00          | 0.76          | 0.82           | 0.70           | 0.74           | 0.73           | 0.64           | 0.67           | 0.62           | 0.63           |
| <b>PCB 99</b>     | 0.64            | 0.75              | 0.76          | 1.00          | 0.89           | 0.74           | 0.81           | 0.76           | 0.61           | 0.68           | 0.56           | 0.57           |
| <b>PCB 118</b>    | 0.53            | 0.82              | 0.82          | 0.89          | 1.00           | 0.79           | 0.84           | 0.80           | 0.71           | 0.75           | 0.66           | 0.66           |
| <b>PCB 153</b>    | 0.39            | 0.99              | 0.70          | 0.74          | 0.79           | 1.00           | 0.98           | 0.96           | 0.97           | 0.97           | 0.94           | 0.94           |
| <b>PCB 138</b>    | 0.45            | 0.98              | 0.74          | 0.81          | 0.84           | 0.98           | 1.00           | 0.94           | 0.94           | 0.97           | 0.89           | 0.90           |
| <b>PCB 156</b>    | 0.40            | 0.97              | 0.73          | 0.76          | 0.80           | 0.96           | 0.94           | 1.00           | 0.91           | 0.89           | 0.93           | 0.93           |
| <b>PCB 187</b>    | 0.30            | 0.96              | 0.64          | 0.61          | 0.71           | 0.97           | 0.94           | 0.91           | 1.00           | 0.96           | 0.95           | 0.94           |
| <b>PCB 183</b>    | 0.36            | 0.97              | 0.67          | 0.68          | 0.75           | 0.97           | 0.97           | 0.89           | 0.96           | 1.00           | 0.91           | 0.92           |
| <b>PCB 180</b>    | 0.25            | 0.95              | 0.62          | 0.56          | 0.66           | 0.94           | 0.89           | 0.93           | 0.95           | 0.91           | 1.00           | 0.99           |
| <b>PCB 170</b>    | 0.25            | 0.95              | 0.63          | 0.57          | 0.66           | 0.94           | 0.90           | 0.93           | 0.94           | 0.92           | 0.99           | 1.00           |

Supplemental Table 2: Comparison of demographic, clinical, and other characteristics between study subjects not selected vs. selected for inclusion in the study

| Characteristic                                  | Not Included      | Included          | Chi squared P-Value   |
|-------------------------------------------------|-------------------|-------------------|-----------------------|
|                                                 | (N=4091)<br>N (%) | (N=1556)<br>N (%) |                       |
| <b>Birth year</b>                               |                   |                   | <0.0001               |
| 1987-1990                                       | 623 (15.2)        | 136 (8.7)         |                       |
| 1991-1993                                       | 1076 (26.3)       | 418 (26.9)        |                       |
| 1994-1996                                       | 1012 (24.7)       | 416 (26.7)        |                       |
| 1997-2005                                       | 1380 (33.7)       | 586 (37.7)        |                       |
| <b>Maternal age</b>                             |                   |                   | 0.53                  |
| ≤19                                             | 88 (2.2)          | 30 (1.9)          |                       |
| 20-24                                           | 602 (14.7)        | 241 (15.5)        |                       |
| 25-29                                           | 1404 (34.3)       | 511 (32.8)        |                       |
| 30-34                                           | 1253 (30.6)       | 461 (29.6)        |                       |
| 35-39                                           | 616 (15.1)        | 257 (16.5)        |                       |
| 40+                                             | 128 (3.1)         | 56 (3.6)          |                       |
| <b>Sex</b>                                      |                   |                   | 0.21                  |
| Male                                            | 3249 (79.4)       | 1212 (77.9)       |                       |
| Female                                          | 842 (20.6)        | 344 (22.1)        |                       |
| <b>Parity</b>                                   |                   |                   | 0.15                  |
| 0                                               | 1242 (30.5)       | 443 (28.6)        |                       |
| 1                                               | 1214 (29.8)       | 507 (32.7)        |                       |
| 2                                               | 806 (19.8)        | 311 (20.1)        |                       |
| 3+                                              | 808 (19.9)        | 289 (18.7)        |                       |
| <b>Maternal socioeconomic status</b>            |                   |                   | 0.93                  |
| Upper white collar workers                      | 487 (15.2)        | 195 (15)          |                       |
| Lower white collar workers                      | 1450 (45.2)       | 589 (45.3)        |                       |
| Blue collar workers                             | 676 (21.1)        | 265 (20.4)        |                       |
| Others                                          | 595 (18.6)        | 250 (19.3)        |                       |
| <b>Maternal psychiatric history<sup>1</sup></b> |                   |                   | 0.01                  |
| No                                              | 3645 (89.1)       | 1349 (86.7)       |                       |
| Yes                                             | 446 (10.9)        | 207 (13.3)        |                       |
| <b>Parental psychiatric history<sup>1</sup></b> |                   |                   | 0.04                  |
| No                                              | 3281 (80.2)       | 1210 (77.8)       |                       |
| Yes                                             | 810 (19.8)        | 346 (22.2)        |                       |
|                                                 | <b>Mean (SD)</b>  | <b>Mean (SD)</b>  | <b>t-test P-value</b> |
| <b>Gestational age at blood draw</b>            | 11.1 (3.5)        | 10.9 (3.4)        | 0.24                  |
| <b>Maternal age</b>                             | 29.5 (5.3)        | 297 (5.3)         | 0.27                  |

<sup>1</sup> See definition in Table 1
